# Supplementary material
Source: MDPI journal article supplement (https://www.mdpi.com/2072-4292/14/14/3453)
Supplement: s1 [file s1]

# **Optimal drone-borne sensor networks for mapping plant species and plant functional types in Midwestern grasslands**

**Emma Hall <sup>1\*</sup>, Mark J. Lara <sup>1,2</sup>**

## **Supplemental Information**

Sensor-data-fusion product confusion matrix tables for plant species and plant functional types (PFTs)

**Supplementary Table S1: “RGB” confusion matrix for plant species classification**

| RGB                |             | Plant Species Reference Data |          |         |           |         |           |        |             |         |       |        |             | Total | Producer Accuracy |
|--------------------|-------------|------------------------------|----------|---------|-----------|---------|-----------|--------|-------------|---------|-------|--------|-------------|-------|-------------------|
|                    |             | Aster                        | Bluestem | Boneset | Red Cedar | Dogwood | Goldenrod | Ground | Rattlesnake | Sapling | Sedge | Shadow | Indiangrass |       |                   |
| Map Data           | Aster       | 0                            | 5        | 1       | 1         | 2       | 2         | 0      | 0           | 1       | 0     | 0      | 3           | 15    | 0%                |
|                    | Bluestem    | 7                            | 19       | 6       | 2         | 5       | 13        | 4      | 1           | 8       | 4     | 2      | 13          | 84    | 23%               |
|                    | Boneset     | 1                            | 6        | 2       | 0         | 0       | 6         | 0      | 0           | 0       | 2     | 0      | 2           | 19    | 11%               |
|                    | Cedar       | 1                            | 0        | 0       | 1         | 0       | 2         | 0      | 0           | 0       | 0     | 0      | 2           | 6     | 17%               |
|                    | Dogwood     | 0                            | 1        | 1       | 2         | 1       | 0         | 0      | 0           | 0       | 1     | 0      | 2           | 8     | 13%               |
|                    | Goldenrod   | 7                            | 9        | 9       | 2         | 5       | 28        | 0      | 1           | 1       | 3     | 5      | 10          | 80    | 35%               |
|                    | Ground      | 0                            | 5        | 0       | 0         | 0       | 1         | 8      | 0           | 0       | 3     | 0      | 1           | 18    | 44%               |
|                    | Rattlesnake | 0                            | 1        | 1       | 0         | 0       | 0         | 0      | 0           | 0       | 1     | 0      | 0           | 3     | 0%                |
|                    | Sapling     | 0                            | 0        | 1       | 1         | 0       | 0         | 0      | 1           | 2       | 1     | 0      | 2           | 8     | 25%               |
|                    | Sedge       | 1                            | 2        | 0       | 0         | 1       | 4         | 0      | 0           | 1       | 6     | 1      | 1           | 17    | 35%               |
|                    | Shadow      | 1                            | 0        | 0       | 2         | 0       | 2         | 1      | 0           | 0       | 0     | 2      | 0           | 8     | 25%               |
|                    | Indiangrass | 3                            | 11       | 3       | 0         | 0       | 5         | 0      | 0           | 1       | 5     | 2      | 8           | 38    | 21%               |
| Total              |             | 21                           | 59       | 24      | 11        | 14      | 63        | 13     | 3           | 14      | 26    | 12     | 44          |       |                   |
| User Accuracy (%)  |             | 0%                           | 32%      | 8%      | 9%        | 7%      | 44%       | 62%    | 0%          | 14%     | 23%   | 17%    | 18%         |       |                   |
| Total Accuracy (%) |             |                              |          |         |           |         |           |        |             |         |       |        |             |       | 25%               |

**Supplementary Table S2: “RGB” confusion matrix for PFT classification (PEF = perennial early flowering, PLF = perennial late flowering)**

| RGB                |          | PFT Reference Data |     |          |          |       |       | Total | Producer Accuracy |
|--------------------|----------|--------------------|-----|----------|----------|-------|-------|-------|-------------------|
|                    |          | PEF                | PLF | C4 Grass | C3 Sedge | Woody | Other |       |                   |
| Map Data           | PEF      | 0                  | 1   | 1        | 1        | 0     | 0     | 3     | 0%                |
|                    | PLF      | 1                  | 56  | 35       | 5        | 12    | 5     | 114   | 49%               |
|                    | C4 Grass | 1                  | 37  | 51       | 9        | 16    | 8     | 122   | 42%               |
|                    | C3 Sedge | 0                  | 5   | 3        | 6        | 2     | 1     | 17    | 35%               |
|                    | Woody    | 1                  | 5   | 7        | 2        | 7     | 0     | 22    | 32%               |
|                    | Other    | 0                  | 4   | 6        | 3        | 2     | 11    | 26    | 42%               |
|                    | Total    | 3                  | 108 | 103      | 26       | 39    | 25    | 304   |                   |
| User Accuracy (%)  |          | 0%                 | 52% | 50%      | 23%      | 18%   | 44%   |       |                   |
| Total Accuracy (%) |          |                    |     |          |          |       |       |       | 43%               |

Supplementary  
CHM” confusion  
species classification

Table S3: “RGB +  
matrix for plant

**Supplementary Table S4: “RGB + CHM”** confusion matrix for PFT classification (PEF = perennial early flowering, PLF = perennial late flowering)

| RGB + CHM          |             | Plant Species Reference Data |          |         |           |         |           |        |             |         |       |        |             | Total | Producer Accuracy |
|--------------------|-------------|------------------------------|----------|---------|-----------|---------|-----------|--------|-------------|---------|-------|--------|-------------|-------|-------------------|
|                    |             | Aster                        | Bluestem | Boneset | Red Cedar | Dogwood | Goldenrod | Ground | Rattlesnake | Sapling | Sedge | Shadow | Indiangrass |       |                   |
| Map Data           | Aster       | 12                           | 4        | 0       | 0         | 1       | 2         | 1      | 0           | 1       | 1     | 0      | 3           | 25    | 48%               |
|                    | Bluestem    | 3                            | 23       | 1       | 0         | 1       | 19        | 3      | 2           | 3       | 4     | 2      | 14          | 75    | 31%               |
|                    | Boneset     | 0                            | 0        | 7       | 1         | 2       | 3         | 0      | 0           | 0       | 1     | 1      | 0           | 15    | 47%               |
|                    | Red Cedar   | 0                            | 2        | 1       | 2         | 0       | 1         | 0      | 0           | 0       | 0     | 2      | 0           | 8     | 25%               |
|                    | Dogwood     | 0                            | 0        | 0       | 1         | 2       | 1         | 0      | 0           | 0       | 0     | 0      | 0           | 4     | 50%               |
|                    | Goldenrod   | 3                            | 10       | 5       | 5         | 6       | 25        | 0      | 1           | 3       | 6     | 1      | 14          | 79    | 32%               |
|                    | Ground      | 0                            | 2        | 0       | 0         | 0       | 0         | 8      | 0           | 0       | 0     | 0      | 0           | 10    | 80%               |
|                    | Rattlesnake | 0                            | 2        | 0       | 0         | 0       | 0         | 0      | 0           | 0       | 0     | 0      | 0           | 2     | 0%                |
|                    | Sapling     | 0                            | 0        | 3       | 0         | 1       | 1         | 0      | 0           | 2       | 0     | 2      | 2           | 11    | 18%               |
|                    | Sedge       | 0                            | 4        | 5       | 1         | 0       | 3         | 1      | 0           | 0       | 11    | 1      | 1           | 27    | 41%               |
|                    | Shadow      | 0                            | 0        | 0       | 1         | 0       | 2         | 0      | 0           | 1       | 0     | 0      | 0           | 4     | 0%                |
|                    | Indiangrass | 3                            | 12       | 2       | 0         | 1       | 6         | 0      | 0           | 4       | 3     | 3      | 10          | 44    | 23%               |
| Total              |             | 21                           | 59       | 24      | 11        | 14      | 63        | 13     | 3           | 14      | 26    | 12     | 44          | 304   |                   |
| User Accuracy (%)  |             | 57%                          | 39%      | 29%     | 18%       | 14%     | 40%       | 62%    | 0%          | 14%     | 42%   | 0%     | 23%         |       |                   |
| Total Accuracy (%) |             |                              |          |         |           |         |           |        |             |         |       |        |             |       | 33%               |

| RGB + CHM          |          | PFT Reference Data |     |          |          |       |       | Total | Producer Accuracy |
|--------------------|----------|--------------------|-----|----------|----------|-------|-------|-------|-------------------|
|                    |          | PEF                | PLF | C4 Grass | C3 Sedge | Woody | Other |       |                   |
| Map Data           | PEF      | 0                  | 0   | 2        | 0        | 0     | 0     | 2     | 0%                |
|                    | PLF      | 1                  | 57  | 31       | 8        | 19    | 3     | 119   | 48%               |
|                    | C4 Grass | 2                  | 34  | 59       | 7        | 9     | 8     | 119   | 50%               |
|                    | C3 Sedge | 0                  | 8   | 5        | 11       | 1     | 2     | 27    | 41%               |
|                    | Woody    | 0                  | 7   | 4        | 0        | 8     | 4     | 23    | 35%               |
|                    | Other    | 0                  | 2   | 2        | 0        | 2     | 8     | 14    | 57%               |
|                    | Total    | 3                  | 106 | 101      | 26       | 37    | 17    | 304   |                   |
| User Accuracy (%)  |          | 0%                 | 54% | 58%      | 42%      | 22%   | 47%   |       |                   |
| Total Accuracy (%) |          |                    |     |          |          |       |       |       | 47%               |

**Supplementary Table S5: “Multispectral”** confusion matrix for plant species classification

| Multispectral      |             | Plant Species Reference Data |          |         |           |         |           |        |             |         |       |        |             | Total | Producer Accuracy |
|--------------------|-------------|------------------------------|----------|---------|-----------|---------|-----------|--------|-------------|---------|-------|--------|-------------|-------|-------------------|
|                    |             | Aster                        | Bluestem | Boneset | Red Cedar | Dogwood | Goldenrod | Ground | Rattlesnake | Sapling | Sedge | Shadow | Indiangrass |       |                   |
| Map Data           | Aster       | 3                            | 5        | 2       | 1         | 0       | 5         | 0      | 0           | 1       | 0     | 0      | 2           | 19    | 16%               |
|                    | Bluestem    | 4                            | 21       | 5       | 3         | 0       | 11        | 3      | 0           | 2       | 6     | 1      | 10          | 66    | 32%               |
|                    | Boneset     | 0                            | 1        | 2       | 1         | 3       | 1         | 0      | 0           | 0       | 1     | 0      | 0           | 9     | 22%               |
|                    | Red Cedar   | 0                            | 0        | 0       | 0         | 1       | 0         | 0      | 0           | 1       | 0     | 0      | 0           | 2     | 0%                |
|                    | Dogwood     | 0                            | 0        | 1       | 1         | 3       | 5         | 0      | 0           | 1       | 1     | 0      | 0           | 12    | 25%               |
|                    | Goldenrod   | 12                           | 17       | 6       | 3         | 5       | 23        | 1      | 1           | 4       | 6     | 6      | 8           | 92    | 25%               |
|                    | Ground      | 0                            | 4        | 0       | 0         | 0       | 0         | 5      | 0           | 1       | 6     | 0      | 4           | 20    | 25%               |
|                    | Rattlesnake | 0                            | 1        | 0       | 0         | 0       | 0         | 0      | 0           | 0       | 0     | 0      | 0           | 1     | 0%                |
|                    | Sapling     | 0                            | 1        | 1       | 1         | 1       | 0         | 0      | 0           | 2       | 2     | 0      | 0           | 8     | 25%               |
|                    | Sedge       | 1                            | 1        | 1       | 0         | 1       | 3         | 3      | 1           | 0       | 2     | 0      | 1           | 14    | 14%               |
|                    | Shadow      | 0                            | 3        | 2       | 1         | 0       | 6         | 0      | 0           | 1       | 1     | 9      | 2           | 25    | 36%               |
|                    | Indiangrass | 1                            | 5        | 4       | 0         | 0       | 9         | 1      | 1           | 1       | 1     | 3      | 17          | 43    | 40%               |
| Total              |             | 21                           | 59       | 24      | 11        | 14      | 63        | 13     | 3           | 14      | 26    | 19     | 44          | 311   |                   |
| User Accuracy (%)  |             | 14%                          | 36%      | 8%      | 0%        | 21%     | 37%       | 38%    | 0%          | 14%     | 8%    | 47%    | 39%         |       |                   |
| Total Accuracy (%) |             |                              |          |         |           |         |           |        |             |         |       |        |             |       | 27%               |

Supplementary Table S6: “Multispectral” confusion matrix for PFT classification (PEF = perennial early flowering, PLF = perennial late flowering)

| Multispectral      |          | PFT Reference Data |     |          |          |       |       | Total | Producer Accuracy |
|--------------------|----------|--------------------|-----|----------|----------|-------|-------|-------|-------------------|
|                    |          | PEF                | PLF | C4 Grass | C3 Sedge | Woody | Other |       |                   |
| Map Data           | PEF      | 0                  | 0   | 1        | 0        | 0     | 0     | 1     | 0%                |
|                    | PLF      | 1                  | 54  | 33       | 7        | 18    | 7     | 120   | 45%               |
|                    | C4 Grass | 1                  | 34  | 53       | 7        | 6     | 8     | 109   | 49%               |
|                    | C3 Sedge | 1                  | 5   | 2        | 2        | 1     | 3     | 14    | 14%               |
|                    | Woody    | 0                  | 7   | 1        | 3        | 11    | 0     | 22    | 50%               |
|                    | Other    | 0                  | 8   | 13       | 7        | 3     | 14    | 45    | 31%               |
|                    | Total    | 3                  | 108 | 103      | 26       | 39    | 32    | 311   |                   |
| User Accuracy (%)  |          | 0%                 | 50% | 51%      | 8%       | 28%   | 44%   |       |                   |
| Total Accuracy (%) |          |                    |     |          |          |       |       |       | 43%               |

Supplementary Table S7: “Multispectral + CHM” confusion matrix for plant species classification

| Multispectral + CHM |             | Plant Species Reference Data |          |         |           |         |           |        |             |         |       |        |             | Total | Producer Accuracy |
|---------------------|-------------|------------------------------|----------|---------|-----------|---------|-----------|--------|-------------|---------|-------|--------|-------------|-------|-------------------|
|                     |             | Aster                        | Bluestem | Boneset | Red Cedar | Dogwood | Goldenrod | Ground | Rattlesnake | Sapling | Sedge | Shadow | Indiangrass |       |                   |
| Map Data            | Aster       | 5                            | 0        | 0       | 0         | 1       | 0         | 0      | 0           | 1       | 1     | 0      | 2           | 10    | 50%               |
|                     | Bluestem    | 1                            | 28       | 3       | 0         | 0       | 12        | 1      | 0           | 5       | 3     | 2      | 11          | 66    | 42%               |
|                     | Boneset     | 2                            | 1        | 8       | 0         | 0       | 3         | 0      | 0           | 0       | 1     | 2      | 1           | 18    | 44%               |
|                     | Red Cedar   | 0                            | 0        | 0       | 11        | 0       | 0         | 0      | 0           | 0       | 0     | 0      | 0           | 11    | 100%              |
|                     | Dogwood     | 0                            | 0        | 0       | 0         | 3       | 3         | 0      | 0           | 0       | 0     | 1      | 0           | 7     | 43%               |
|                     | Goldenrod   | 7                            | 12       | 13      | 0         | 5       | 32        | 0      | 0           | 4       | 2     | 4      | 6           | 85    | 38%               |
|                     | Ground      | 0                            | 2        | 0       | 0         | 0       | 0         | 7      | 0           | 0       | 2     | 0      | 1           | 12    | 58%               |
|                     | Rattlesnake | 0                            | 0        | 0       | 0         | 0       | 0         | 0      | 0           | 0       | 1     | 0      | 0           | 1     | 0%                |
|                     | Sapling     | 0                            | 0        | 0       | 0         | 5       | 5         | 0      | 0           | 3       | 0     | 0      | 0           | 13    | 23%               |
|                     | Sedge       | 1                            | 5        | 0       | 0         | 0       | 4         | 2      | 2           | 0       | 15    | 0      | 2           | 31    | 48%               |
|                     | Shadow      | 1                            | 3        | 0       | 0         | 0       | 1         | 0      | 0           | 1       | 0     | 10     | 0           | 16    | 63%               |
|                     | Indiangrass | 4                            | 8        | 0       | 0         | 0       | 3         | 3      | 1           | 0       | 1     | 0      | 21          | 41    | 51%               |
| Total               |             | 21                           | 59       | 24      | 11        | 14      | 63        | 13     | 3           | 14      | 26    | 19     | 44          | 311   |                   |
| User Accuracy (%)   |             | 24%                          | 47%      | 33%     | 100%      | 21%     | 51%       | 54%    | 0%          | 21%     | 58%   | 53%    | 48%         |       |                   |
| Total Accuracy (%)  |             |                              |          |         |           |         |           |        |             |         |       |        |             |       | 45%               |

Supplementary Table S8: “Multispectral + CHM” confusion matrix for PFT classification (PEF = perennial early flowering, PLF = perennial late flowering)

| Multispectral + CHM |          | PFT Reference Data |     |          |          |       |       | Total | Producer Accuracy |
|---------------------|----------|--------------------|-----|----------|----------|-------|-------|-------|-------------------|
|                     |          | PEF                | PLF | C4 Grass | C3 Sedge | Woody | Other |       |                   |
| Map Data            | PEF      | 0                  | 0   | 0        | 1        | 0     | 0     | 1     | 0%                |
|                     | PLF      | 0                  | 70  | 22       | 4        | 11    | 6     | 113   | 62%               |
|                     | C4 Grass | 1                  | 23  | 68       | 4        | 5     | 6     | 107   | 64%               |
|                     | C3 Sedge | 2                  | 5   | 7        | 15       | 0     | 2     | 31    | 48%               |
|                     | Woody    | 0                  | 8   | 0        | 0        | 22    | 1     | 31    | 71%               |
|                     | Other    | 0                  | 2   | 6        | 2        | 1     | 17    | 28    | 61%               |
|                     | Total    | 3                  | 108 | 103      | 26       | 39    | 32    | 311   |                   |
| User Accuracy (%)   |          | 0%                 | 65% | 66%      | 58%      | 56%   | 53%   |       |                   |
| Total Accuracy (%)  |          |                    |     |          |          |       |       |       | 61%               |

Supplementary Table S9: “Multispectral + CHM + Phenology” confusion matrix for plant species classification

| Multispectral +<br>CHM + Phenology |             | Plant Species Reference Data |          |         |           |         |           |        |             |         |       |        |             | Total | Producer<br>Accuracy |
|------------------------------------|-------------|------------------------------|----------|---------|-----------|---------|-----------|--------|-------------|---------|-------|--------|-------------|-------|----------------------|
|                                    |             | Aster                        | Bluestem | Boneset | Red Cedar | Dogwood | Goldenrod | Ground | Rattlesnake | Sapling | Sedge | Shadow | Indiangrass |       |                      |
| Map Data                           | Aster       | 0                            | 0        | 0       | 0         | 1       | 1         | 0      | 0           | 0       | 0     | 0      | 0           | 2     | 0%                   |
|                                    | Bluestem    | 1                            | 11       | 1       | 0         | 0       | 5         | 0      | 0           | 3       | 2     | 0      | 2           | 25    | 44%                  |
|                                    | Boneset     | 1                            | 0        | 12      | 0         | 2       | 1         | 0      | 1           | 1       | 1     | 0      | 4           | 23    | 52%                  |
|                                    | Red Cedar   | 0                            | 0        | 0       | 11        | 0       | 2         | 0      | 0           | 0       | 0     | 0      | 0           | 13    | 85%                  |
|                                    | Dogwood     | 0                            | 0        | 0       | 0         | 4       | 0         | 0      | 0           | 1       | 0     | 0      | 0           | 5     | 80%                  |
|                                    | Goldenrod   | 2                            | 4        | 5       | 0         | 5       | 38        | 0      | 0           | 4       | 2     | 4      | 7           | 71    | 54%                  |
|                                    | Ground      | 0                            | 5        | 0       | 0         | 0       | 0         | 8      | 0           | 0       | 1     | 0      | 1           | 15    | 53%                  |
|                                    | Rattlesnake | 0                            | 0        | 0       | 0         | 0       | 0         | 0      | 0           | 0       | 0     | 0      | 0           | 0     | 0%                   |
|                                    | Sapling     | 0                            | 0        | 1       | 0         | 1       | 3         | 0      | 0           | 1       | 0     | 0      | 0           | 6     | 17%                  |
|                                    | Sedge       | 0                            | 0        | 1       | 0         | 0       | 2         | 3      | 2           | 0       | 15    | 0      | 3           | 26    | 58%                  |
|                                    | Shadow      | 0                            | 5        | 0       | 0         | 1       | 7         | 0      | 0           | 1       | 0     | 13     | 0           | 27    | 48%                  |
|                                    | Indiangrass | 1                            | 6        | 4       | 0         | 0       | 0         | 2      | 0           | 3       | 5     | 2      | 23          | 46    | 50%                  |
| Total                              |             | 5                            | 31       | 24      | 11        | 14      | 59        | 13     | 3           | 14      | 26    | 19     | 40          | 259   |                      |
| User Accuracy (%)                  |             | 0%                           | 35%      | 50%     | 100%      | 29%     | 64%       | 62%    | 0%          | 7%      | 58%   | 68%    | 58%         |       |                      |
| Total Accuracy (%)                 |             |                              |          |         |           |         |           |        |             |         |       |        |             |       | 52%                  |

Supplementary Table S10: “Multispectral + CHM + Phenology” confusion matrix for PFT classification (PEF = perennial early flowering, PLF = perennial late flowering)

| Multispectral +<br>CHM + Phenology |          | PFT Reference Data |     |          |          |       |       | Total | Producer<br>Accuracy |
|------------------------------------|----------|--------------------|-----|----------|----------|-------|-------|-------|----------------------|
|                                    |          | PEF                | PLF | C4 Grass | C3 Sedge | Woody | Other |       |                      |
| Map Data                           | PEF      | 0                  | 0   | 0        | 0        | 0     | 0     | 0     | 0%                   |
|                                    | PLF      | 1                  | 60  | 15       | 3        | 13    | 4     | 96    | 63%                  |
|                                    | C4 Grass | 0                  | 12  | 42       | 7        | 6     | 4     | 71    | 59%                  |
|                                    | C3 Sedge | 2                  | 3   | 3        | 15       | 0     | 3     | 26    | 58%                  |
|                                    | Woody    | 0                  | 6   | 0        | 0        | 18    | 0     | 24    | 75%                  |
|                                    | Other    | 0                  | 7   | 11       | 1        | 2     | 21    | 42    | 50%                  |
|                                    | Total    | 3                  | 88  | 71       | 26       | 39    | 32    | 259   |                      |
| User Accuracy (%)                  |          | 0%                 | 68% | 59%      | 58%      | 46%   | 66%   |       |                      |
| Total Accuracy (%)                 |          |                    |     |          |          |       |       |       | 60%                  |

Supplementary Table S11: “Hyperspectral” confusion matrix for plant species classification

| Hyperspectral      |             | Plant Species Reference Data |          |         |           |         |           |        |             |         |       |             | Total | Producer Accuracy |
|--------------------|-------------|------------------------------|----------|---------|-----------|---------|-----------|--------|-------------|---------|-------|-------------|-------|-------------------|
|                    |             | Aster                        | Bluestem | Boneset | Red Cedar | Dogwood | Goldenrod | Ground | Rattlesnake | Sapling | Sedge | Indiangrass |       |                   |
| Map Data           | Aster       | 7                            | 0        | 0       | 0         | 0       | 6         | 0      | 0           | 0       | 1     | 0           | 14    | 50%               |
|                    | Bluestem    | 0                            | 50       | 2       | 3         | 0       | 1         | 0      | 0           | 3       | 3     | 12          | 74    | 68%               |
|                    | Boneset     | 0                            | 2        | 17      | 0         | 0       | 0         | 0      | 0           | 0       | 0     | 0           | 19    | 89%               |
|                    | Red Cedar   | 0                            | 0        | 0       | 8         | 0       | 0         | 0      | 0           | 0       | 0     | 0           | 8     | 100%              |
|                    | Dogwood     | 0                            | 0        | 0       | 0         | 13      | 0         | 0      | 0           | 0       | 0     | 0           | 13    | 100%              |
|                    | Goldenrod   | 13                           | 3        | 3       | 0         | 1       | 54        | 0      | 0           | 4       | 7     | 1           | 86    | 63%               |
|                    | Ground      | 0                            | 1        | 0       | 0         | 0       | 0         | 12     | 0           | 0       | 0     | 0           | 13    | 92%               |
|                    | Rattlesnake | 0                            | 0        | 0       | 0         | 0       | 0         | 0      | 3           | 0       | 0     | 0           | 3     | 100%              |
|                    | Sapling     | 0                            | 0        | 2       | 0         | 0       | 0         | 0      | 0           | 7       | 0     | 0           | 9     | 78%               |
|                    | Sedge       | 1                            | 0        | 0       | 0         | 0       | 0         | 1      | 0           | 0       | 15    | 1           | 18    | 83%               |
|                    | Indiangrass | 0                            | 3        | 0       | 0         | 0       | 2         | 0      | 0           | 0       | 0     | 30          | 35    | 86%               |
| Total              |             | 21                           | 59       | 24      | 11        | 14      | 63        | 13     | 3           | 14      | 26    | 44          |       |                   |
| User Accuracy (%)  |             | 33%                          | 85%      | 71%     | 73%       | 93%     | 86%       | 92%    | 100%        | 50%     | 58%   | 68%         |       |                   |
| Total Accuracy (%) |             |                              |          |         |           |         |           |        |             |         |       |             |       | 73%               |

Supplementary Table S12: “Hyperspectral” confusion matrix for PFT classification (PEF = perennial early flowering, PLF = perennial late flowering)

| Hyperspectral      |          | PFT Reference Data |     |          |          |       |       | Total | Producer Accuracy |
|--------------------|----------|--------------------|-----|----------|----------|-------|-------|-------|-------------------|
|                    |          | PEF                | PLF | C4 Grass | C3 Sedge | Woody | Other |       |                   |
| Map Data           | PEF      | 3                  | 0   | 0        | 0        | 0     | 0     | 3     | 100%              |
|                    | PLF      | 0                  | 100 | 6        | 8        | 5     | 0     | 119   | 84%               |
|                    | C4 Grass | 0                  | 5   | 95       | 3        | 6     | 0     | 109   | 87%               |
|                    | C3 Sedge | 0                  | 1   | 1        | 15       | 0     | 1     | 18    | 83%               |
|                    | Woody    | 0                  | 2   | 0        | 0        | 28    | 0     | 30    | 93%               |
|                    | Other    | 0                  | 0   | 1        | 0        | 0     | 12    | 13    | 92%               |
| Total              |          | 3                  | 108 | 103      | 26       | 39    | 13    | 292   |                   |
| User Accuracy (%)  |          | 100%               | 93% | 92%      | 58%      | 72%   | 92%   |       |                   |
| Total Accuracy (%) |          |                    |     |          |          |       |       |       | 86%               |

Supplementary Table S13: “Hyperspectral + CHM” confusion matrix for plant species classification

| Hyperspectral + CHM |             | Plant Species Reference Data |          |         |           |         |           |        |             |         |       | Total | Producer Accuracy |             |
|---------------------|-------------|------------------------------|----------|---------|-----------|---------|-----------|--------|-------------|---------|-------|-------|-------------------|-------------|
|                     |             | Aster                        | Bluestem | Boneset | Red Cedar | Dogwood | Goldenrod | Ground | Rattlesnake | Sapling | Sedge |       |                   | Indiangrass |
| Map Data            | Aster       | 10                           | 0        | 0       | 0         | 0       | 2         | 0      | 0           | 0       | 0     | 0     | 12                | 83%         |
|                     | Bluestem    | 0                            | 55       | 0       | 2         | 2       | 1         | 1      | 0           | 0       | 0     | 12    | 73                | 75%         |
|                     | Boneset     | 0                            | 1        | 20      | 0         | 0       | 1         | 0      | 0           | 2       | 0     | 0     | 24                | 83%         |
|                     | Red Cedar   | 0                            | 0        | 0       | 8         | 0       | 0         | 0      | 0           | 0       | 0     | 0     | 8                 | 100%        |
|                     | Dogwood     | 0                            | 0        | 0       | 0         | 9       | 0         | 0      | 0           | 0       | 1     | 0     | 10                | 90%         |
|                     | Goldenrod   | 9                            | 0        | 3       | 0         | 2       | 58        | 0      | 0           | 2       | 8     | 3     | 85                | 68%         |
|                     | Ground      | 0                            | 0        | 0       | 0         | 0       | 0         | 12     | 0           | 0       | 0     | 0     | 12                | 100%        |
|                     | Rattlesnake | 0                            | 0        | 0       | 0         | 0       | 0         | 0      | 3           | 0       | 0     | 0     | 3                 | 100%        |
|                     | Sapling     | 0                            | 0        | 0       | 0         | 0       | 0         | 0      | 0           | 10      | 0     | 0     | 10                | 100%        |
|                     | Sedge       | 2                            | 0        | 0       | 1         | 0       | 1         | 0      | 0           | 0       | 16    | 0     | 20                | 80%         |
|                     | Indiangrass | 0                            | 3        | 1       | 0         | 1       | 0         | 0      | 0           | 0       | 1     | 29    | 35                | 83%         |
| Total               |             | 21                           | 59       | 24      | 11        | 14      | 63        | 13     | 3           | 14      | 26    | 44    | 292               |             |
| User Accuracy (%)   |             | 48%                          | 93%      | 83%     | 73%       | 64%     | 92%       | 92%    | 100%        | 71%     | 62%   | 66%   |                   |             |
| Total Accuracy (%)  |             |                              |          |         |           |         |           |        |             |         |       |       |                   | 78%         |

Supplementary Table S14: “Hyperspectral + CHM” confusion matrix for PFT classification (PEF = perennial early flowering, PLF = perennial late flowering)

| Hyperspectral + CHM |          | PFT Reference Data |     |          |          |       |       | Total | Producer Accuracy |
|---------------------|----------|--------------------|-----|----------|----------|-------|-------|-------|-------------------|
|                     |          | PEF                | PLF | C4 Grass | C3 Sedge | Woody | Other |       |                   |
| Map Data            | PEF      | 3                  | 0   | 0        | 0        | 0     | 0     | 3     | 100%              |
|                     | PLF      | 0                  | 103 | 4        | 8        | 6     | 0     | 121   | 85%               |
|                     | C4 Grass | 0                  | 2   | 99       | 1        | 5     | 1     | 108   | 92%               |
|                     | C3 Sedge | 0                  | 3   | 0        | 16       | 1     | 0     | 20    | 80%               |
|                     | Woody    | 0                  | 0   | 0        | 1        | 27    | 0     | 28    | 96%               |
|                     | Other    | 0                  | 0   | 0        | 0        | 0     | 12    | 12    | 100%              |
| Total               |          | 3                  | 108 | 103      | 26       | 39    | 13    | 292   |                   |
| User Accuracy (%)   |          | 100%               | 95% | 96%      | 62%      | 69%   | 92%   |       |                   |
| Total Accuracy (%)  |          |                    |     |          |          |       |       |       | 89%               |
